# Supplementary material for: Optical diagnosis of the progression and reversal of CCl4-induced liver injury in rodent model using minimally invasive autofluorescence spectroscopy
Source: Royal Society of Chemistry journal article supplement (doi:10.1039/c4an01507j), 2015-01-01
Supplement: c4an01507j1.pdf [file c4an01507j1.pdf]

**Supplementary Fig. 1.** PC-LDA score plots obtained using confusion matrix analysis. Resultant PC-LDA vector data point from each animal is given separately.

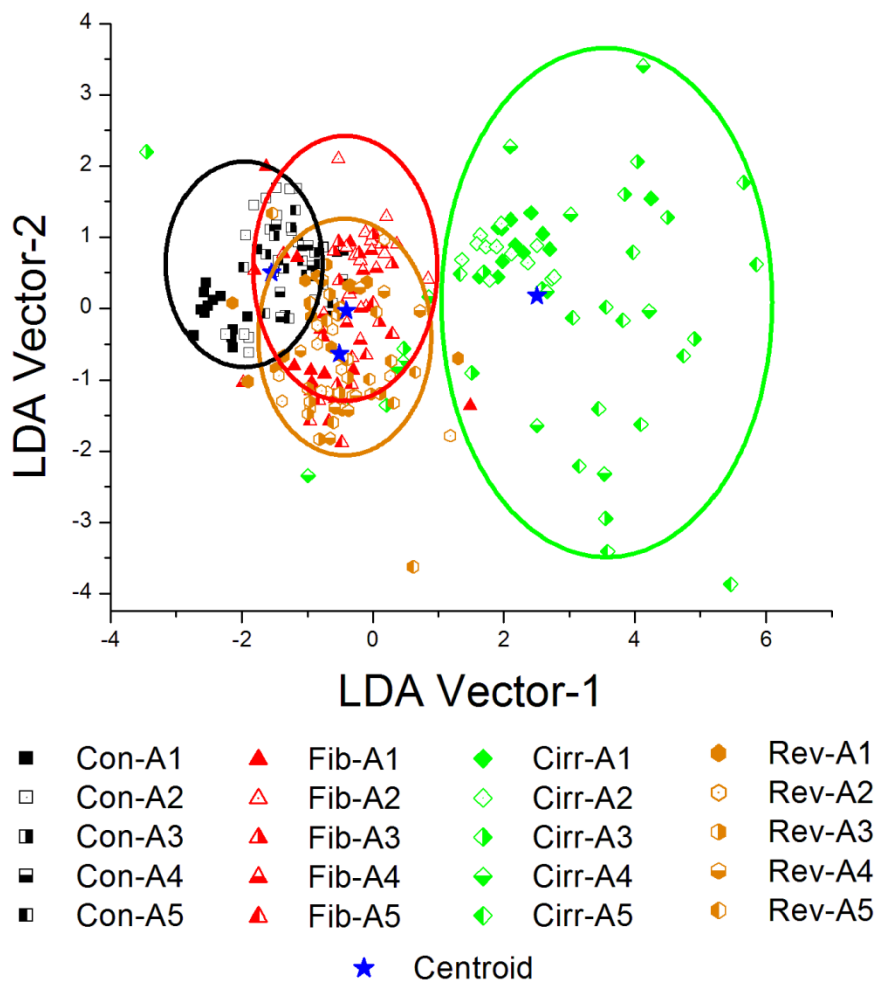

**Supplementary Table 1.** Confusion matrix for PC-LDA of control, fibrosis, cirrhosis and reversal groups

| <b>Tissue type</b> | <b>Autofluorescence spectral prediction</b> |                 |                  |                 | <b>Total</b> |
|--------------------|---------------------------------------------|-----------------|------------------|-----------------|--------------|
|                    | <b>Control</b>                              | <b>Fibrosis</b> | <b>Cirrhosis</b> | <b>Reversal</b> |              |
| <b>Control</b>     | 55                                          | 5               | 0                | 0               | 60           |
| <b>Fibrosis</b>    | 4                                           | 33              | 1                | 22              | 60           |
| <b>Cirrhosis</b>   | 1                                           | 1               | 52               | 6               | 60           |
| <b>Reversal</b>    | 7                                           | 10              | 1                | 42              | 60           |
